# Supplementary material
Source: Springer Nature journal article supplement (https://www.springermedizin.de/resource/supplementary/13054_2010_8594_MOESM3_ESM.pdf/9732322)

# PaO<sub>2</sub>/FiO<sub>2</sub> (mmHg)

$p < 0.001$

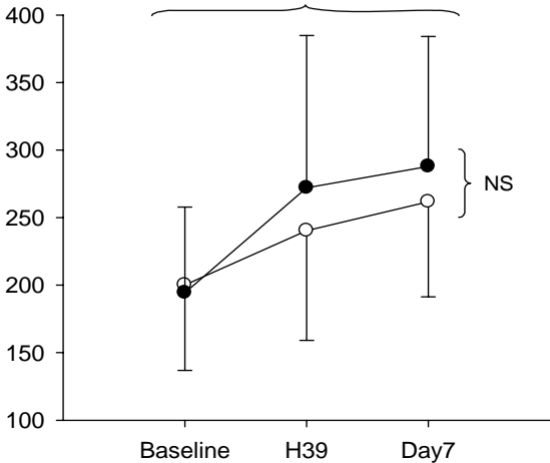

Supplement: MOESM3 [file 9732322]
